# Supplementary material for: Y-shaped potential third-order nonlinear optical material – 3-(2-amino-2-oxoethyl)-5-methyl hexanoic acid: an analysis of structural, spectroscopic and docking studies
Source: Royal Society of Chemistry journal article supplement (doi:10.1039/d0nj02658a), 2020-01-01
Supplement: d0nj02658a2.pdf [file d0nj02658a2.pdf]

### Supplementary Information

Y-shaped potential third-order nonlinear optical material - 3-(2-amino-2-oxoethyl)-5-methyl hexanoic acid: An analysis of structural, spectroscopic and docking studies

Nuthalapati Poojith<sup>a</sup>, Krishna Murthy Potla<sup>b\*</sup>, Francisco A. P. Osório<sup>c,d</sup>, Clodoaldo Valverde<sup>e,f</sup>, Suneetha Vankayalapati<sup>a,g</sup>, P. A. Suchetan<sup>h</sup>, M. Rajai<sup>i</sup>

<sup>a</sup> Intern, Sri Ramachandra Institute of Higher Education and Research, Ramachandra Nagar, Porur, Chennai, 600 116, India.

<sup>b</sup> Department of Chemistry, Bapatla Engineering College (Autonomous), Acharya Nagarjuna University Post Graduate Research Centre, Bapatla-522 102, A.P., India.

<sup>c</sup> Instituto de Física, Universidade Federal de Goiás, 74.690-900, Goiânia, GO, Brazil.

<sup>d</sup> Pontificia Universidade Católica de Goiás, 74605-100, Goiânia, GO, Brazil.

<sup>e</sup> Laboratório de Modelagem Molecular Aplicada e Simulação (LaMMAS), Campus de Ciências Exatas e Tecnológicas, Universidade Estadual de Goiás, 75001-970, Anápolis, GO, Brazil.

<sup>f</sup> Universidade Paulista, 74845-090, Goiânia, GO, Brazil.

<sup>g</sup> Department of Chemistry, Bapatla College of Arts and Sciences, Bapatla-522 101, A.P., India.

<sup>h</sup> Department of Studies and Research in Chemistry, University College of Science, Tumkur University, Tumkur-572 103, Karnataka, India.

<sup>i</sup> Department of Physics, Govt. Thirumagal Mills College, Gudiyatham, Vellore, 632602, Tamilnadu, India.

\*Corresponding author: krishnamurthypotla@gmail.com

**Fig. S1** Some potent biologically active drug moieties.

**Fig. S2** <sup>1</sup>H-NMR spectrum of AOEMHA.

**Fig. S3** <sup>13</sup>C-NMR spectrum of AOEMHA.

**Fig. S4** 3D Hirshfeld surface and 2D Finger print analysis of 3-(2-amino-2-oxoethyl)-5-methylhexanoic acid.

**Fig. S5** Representation of bond critical points (BCP) for the crystal structures of 3-(2-amino-2-oxoethyl)-5-methylhexanoic acid indicating the bond paths analyzed in Table S1.

**Fig. S6** Infrared spectrum of AOEMHA using (a) DFT/B3LYP/6-311++G (d,p) and (b) experimental data.

**Fig. S7** Raman spectrum of AOEMHA using (a) DFT/B3LYP/6-311++G (d,p) and (b) experimental data.

**Fig. S8** Pictorial representation of HOMO-LUMO plots of AOEMHA.

**Fig. S9** Atomic absorption and emission spectra of AOEMHA are computed at TD-DFT/B3LYP/6-311++G(d) level of theory.

**Fig. S10** Representative of MEP surface of AOEMHA.

**Fig. S11** Two dimensional graphical embodiments of Electron Localization Function (ELF) of AOEMHA.

**Fig. S12** Two dimensional graphical embodiments of Localized Orbital Locator (LOL) of AOEMHA.

**Fig. S13** Groups acid (A), amide (B) and isopropyl (C) of AOEMHA compound.

**Table S1.** Topological analysis performed via QTAIM for the crystal structures of 3-(2-amino-2-oxoethyl)-5-methylhexanoic acid, all data are in a.u..

**Table S2.** Geometrical parameters of the 3-(2-amino-2-oxoethyl)-5-methylhexanoic acid.

**Table S3.** Calculated scaled wave numbers, observed IR and Raman bands and assignment of 3-(2-amino-2-oxoethyl)-5-methylhexanoic acid.

**Table S4.** Second-order perturbation theory analysis of Fock matrix in NBO basis corresponding to the intramolecular bonds of the title compound.

**Table S5.** NBO results showing the formation of Lewis and non-Lewis orbitals.

**Table S6.** Partial Charges in isolated and embedded molecule

**Table S7.** Comparison of linear refractive index for 3-(2-amino-2-oxoethyl)-5-methylhexanoic acid crystal with experimental results for others organic crystals.

**Table S8.** Molecular docking values of AOEMHA with target proteins (a) 4BDU, (b) 4DBS, (c) 4DBW, (d) 4FAL and (e) 4FAM.

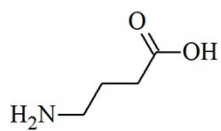

(1)

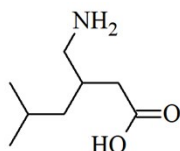

(2)

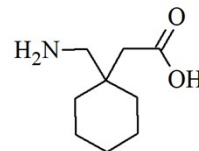

(3)

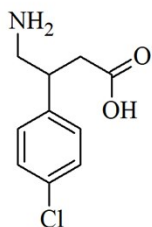

(4)

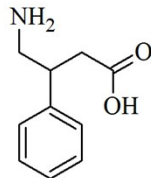

(5)

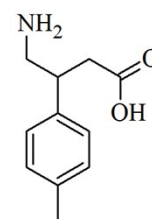

(6)

**Fig. S1** Some potent biologically active drug moieties.

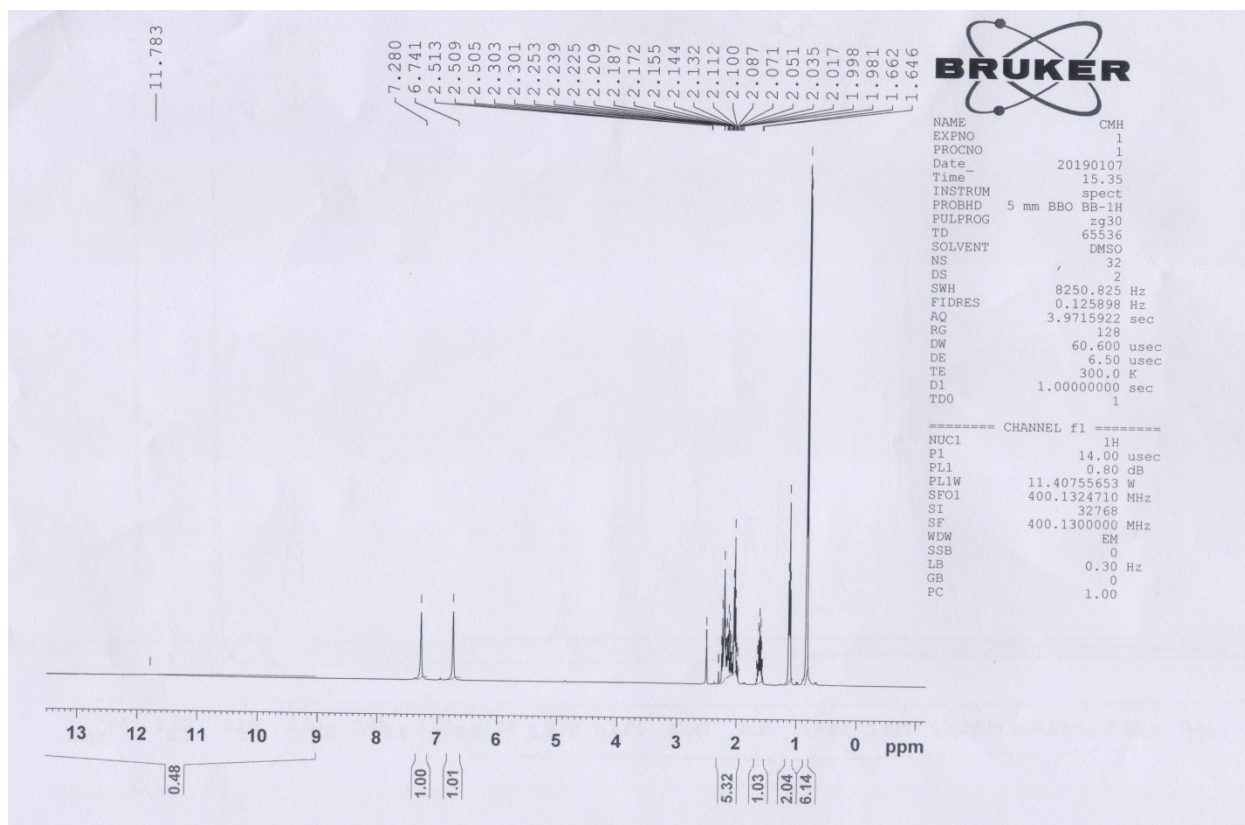

**Fig. S2**  $^1\text{H}$ -NMR spectrum of AOEMHA.

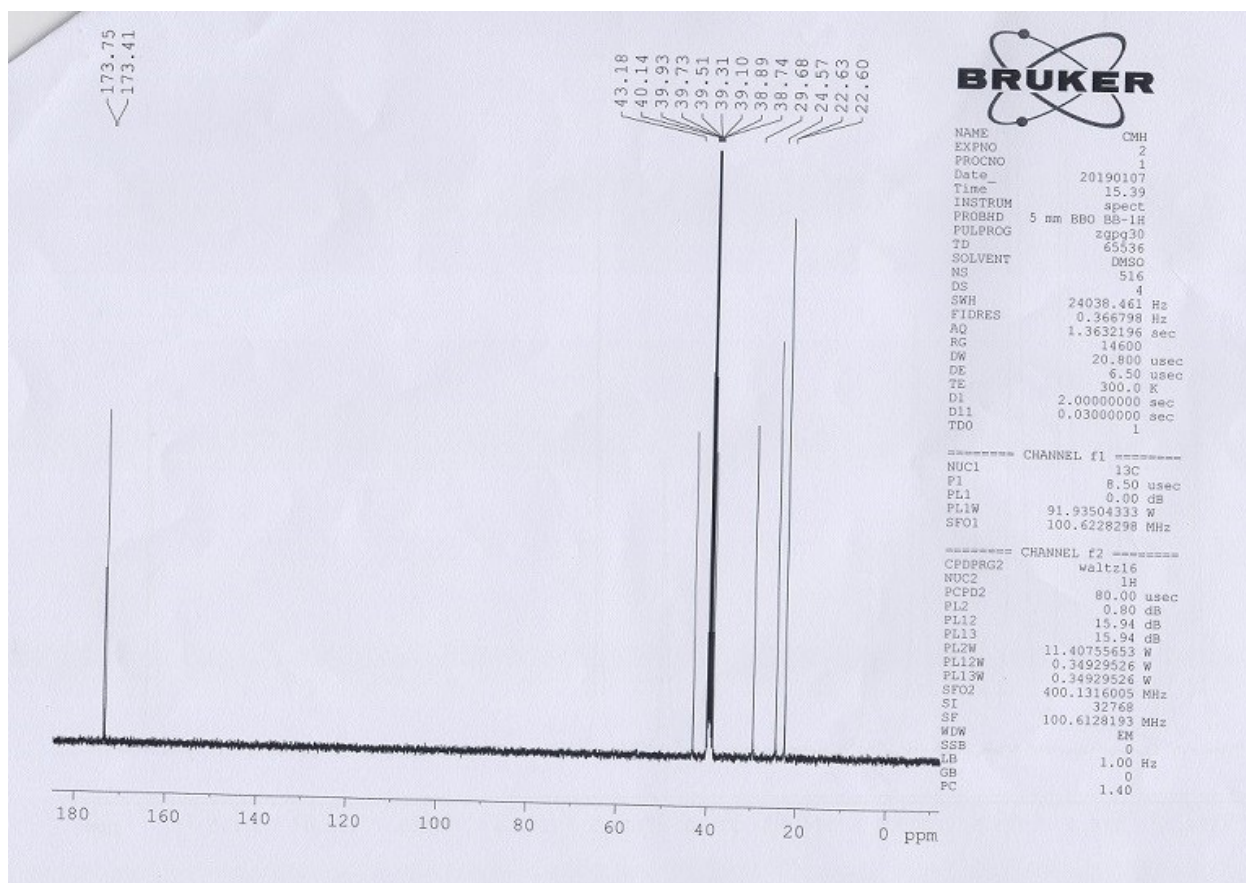

**Fig. S3**  $^{13}\text{C}$ -NMR spectrum of AOEMHA.

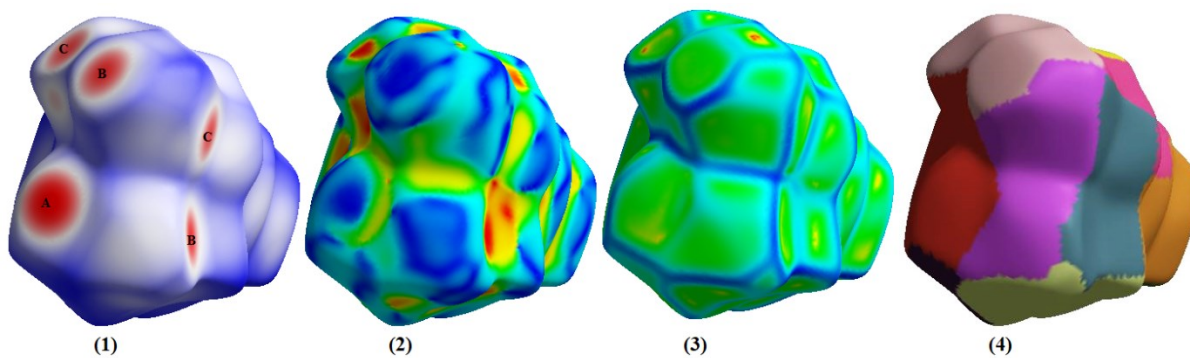

(A) Pictorial representation of Hirshfeld surfaces of AOEMHA  $d_{norm}$  (1), *shape index* (2), *curvedness* (3) and *fragment path* (4).

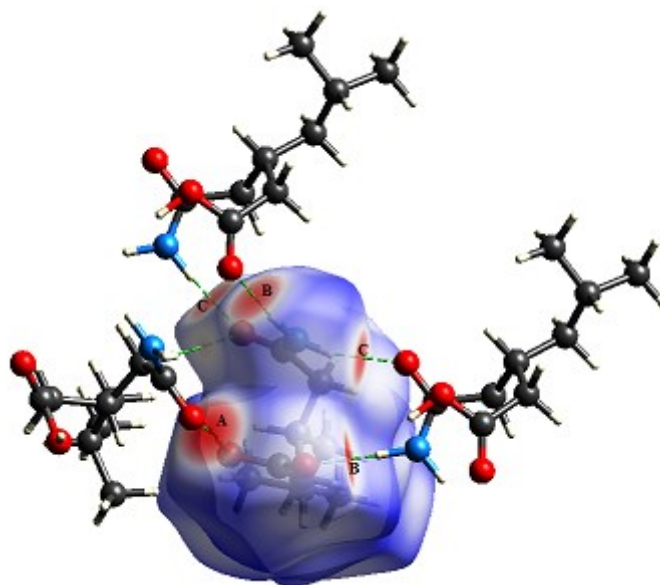

(B) View of O2-H3---O1, N5-H6---O4 and N5-H7---O1 interactions on  $d_{norm}$  surface.

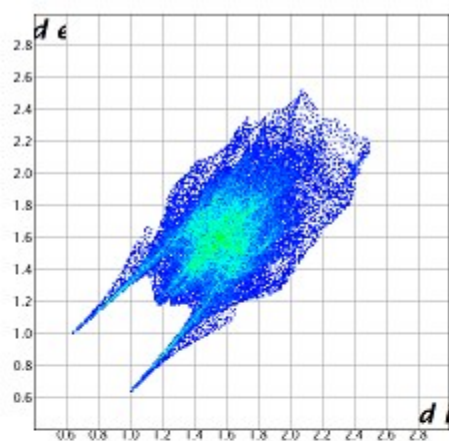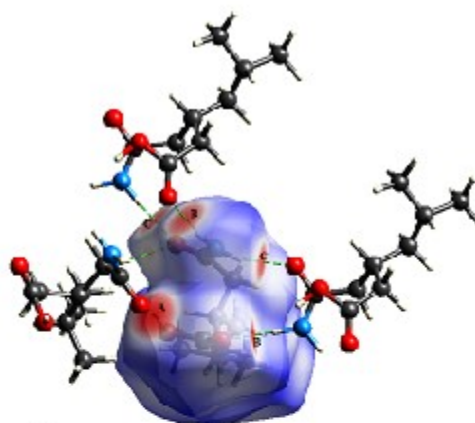

(a)

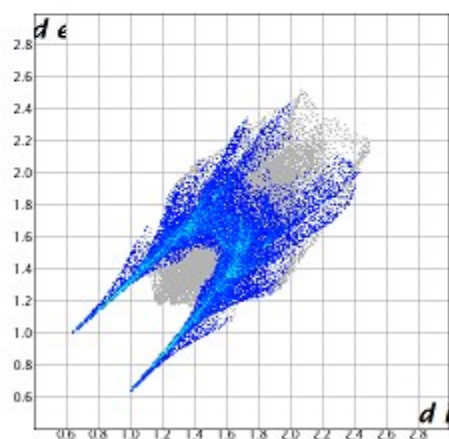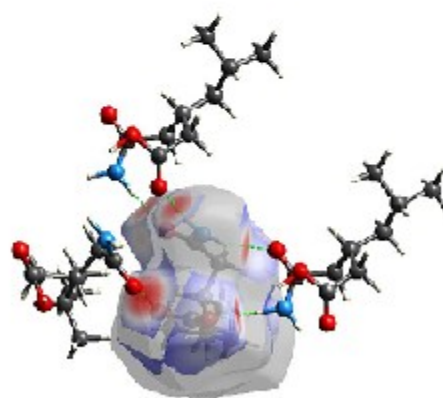

(b)

(c) Finger print analysis (a) Total interaction 100% (b) O---H/H---O interaction 33.3%.

(C) 2D Finger print plots of AOEMHA along with percentage of interactions.

**Fig. S4** 3D Hirshfeld surface and 2D Finger print analysis of 3-(2-amino-2-oxoethyl)-5-methylhexanoic acid.

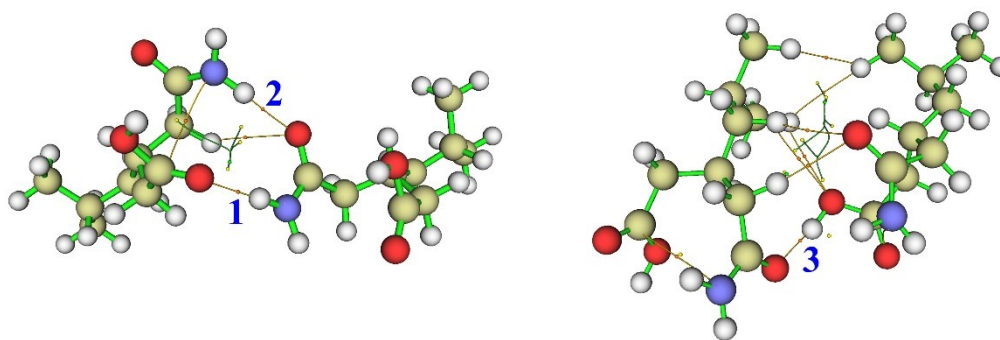

**Fig. S5** Representation of bond critical points (BCP) for the crystal structures of 3-(2-amino-2-oxoethyl)-5-methylhexanoic acid indicating the bond paths analyzed in Table S1.



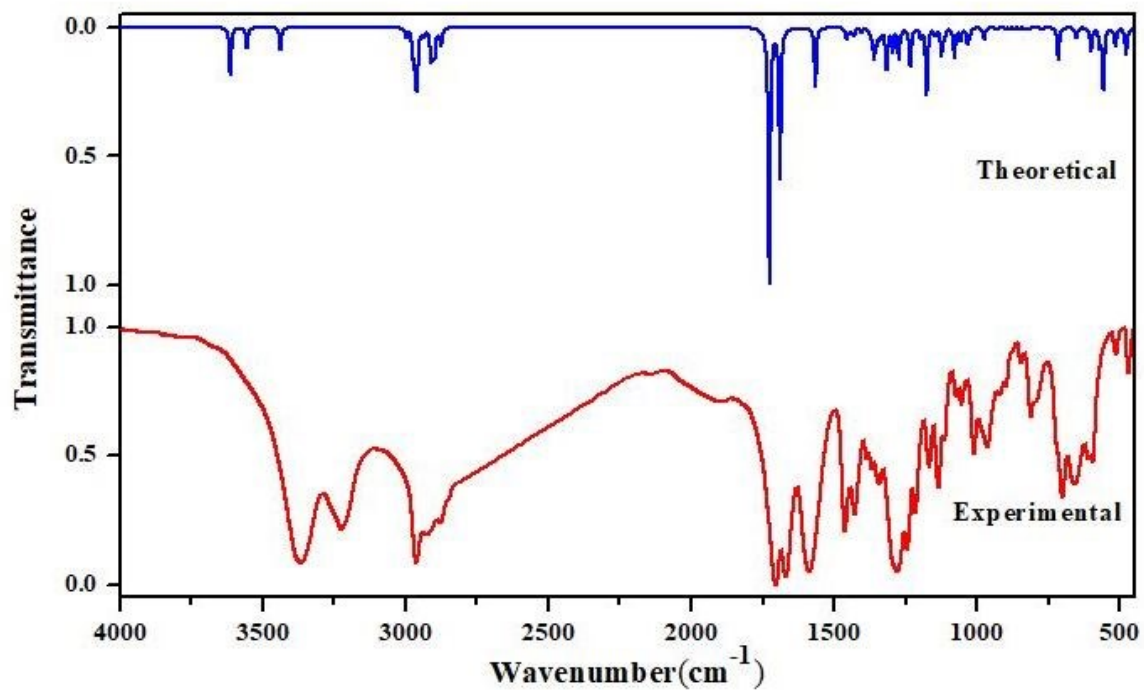

**Fig. S6** Infrared spectrum of AOEMHA using (a) DFT/B3LYP/6-311++G (d,p) and (b) experimental data.

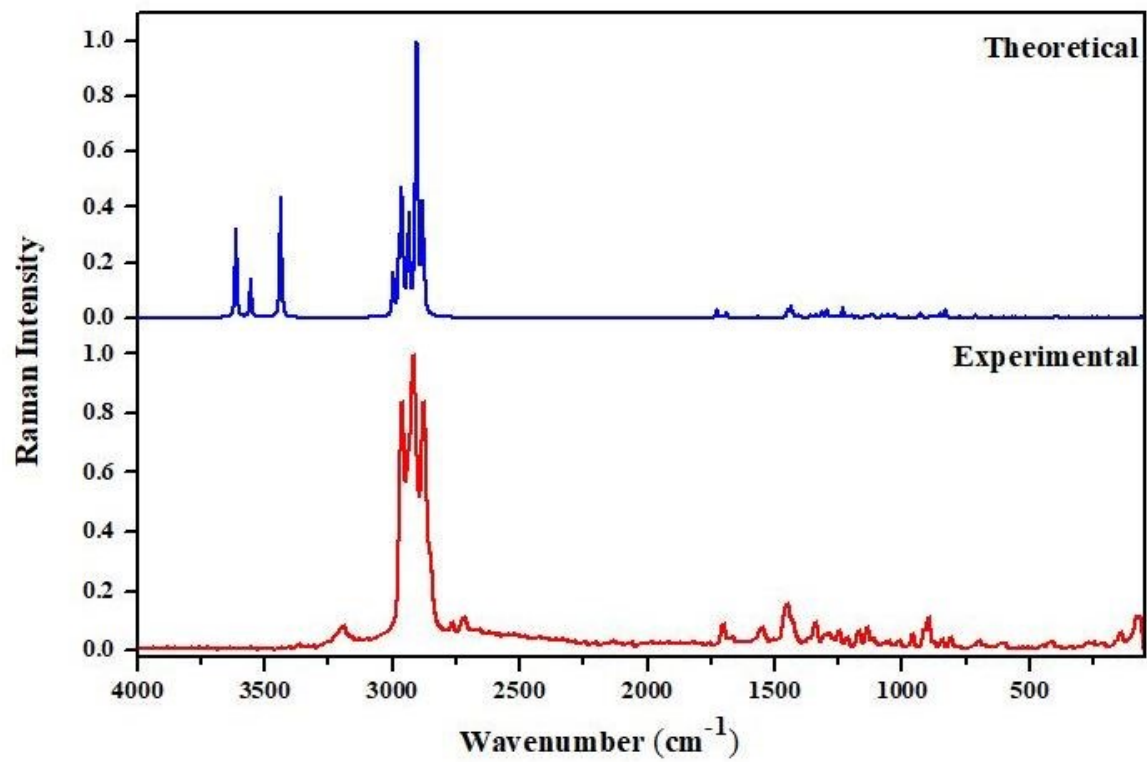

**Fig. S7** Raman spectrum of AOEMHA using (a) DFT/B3LYP/6-311++G (d,p) and (b) experimental data.

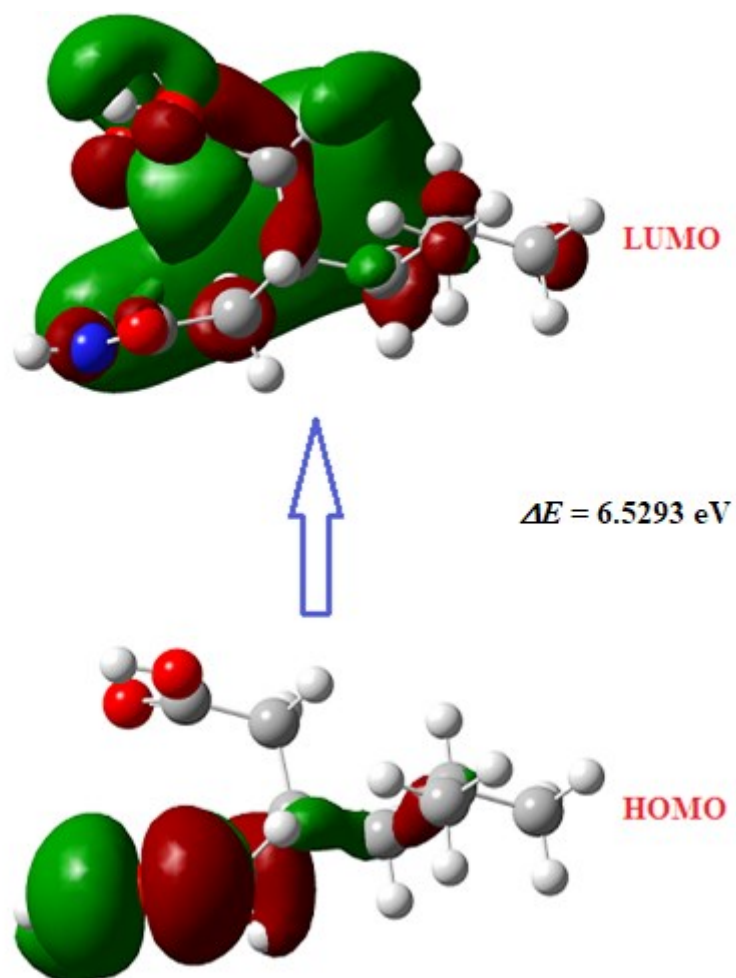

**Fig. S8** Pictorial representation of HOMO-LUMO plots of AOEMHA.

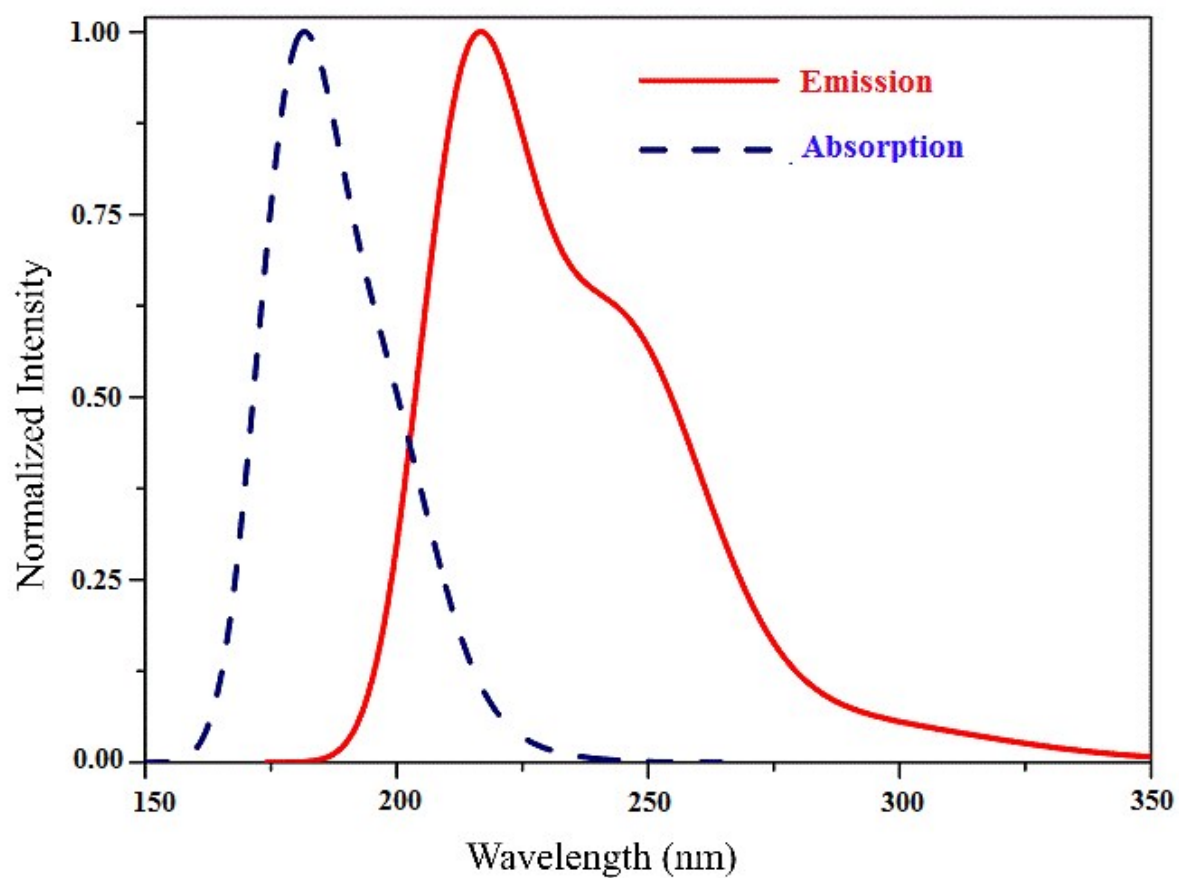

**Fig. S9** Atomic absorption and emission spectra were computed at TD-DFT/B3LYP/6-311++G(d) level of theory.

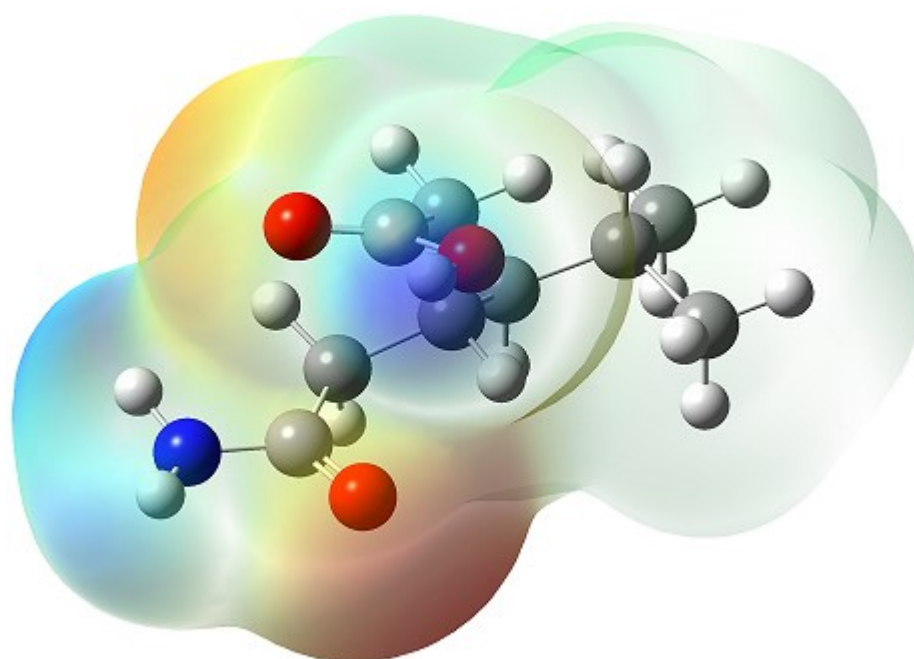

**Fig. S10** Representative of MEP surface of AOEMHA.

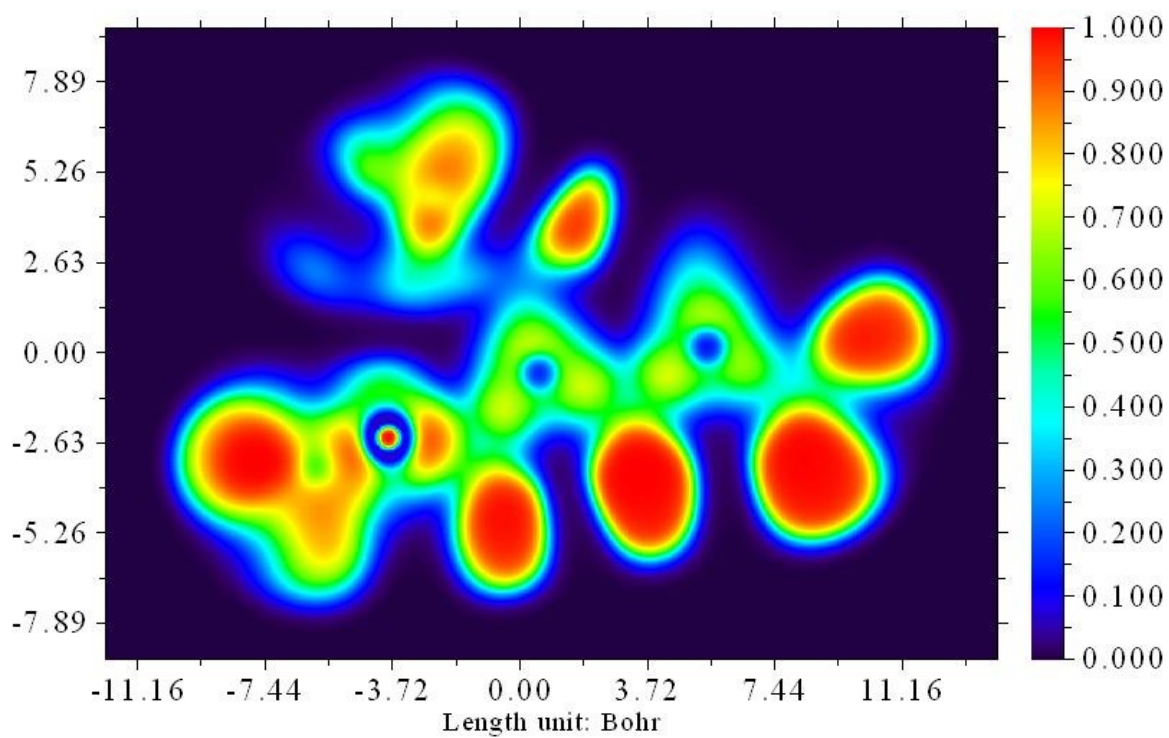

**Fig. S11** Two dimensional graphical embodiments of Electron Localization Function (ELF) of AOEMHA.

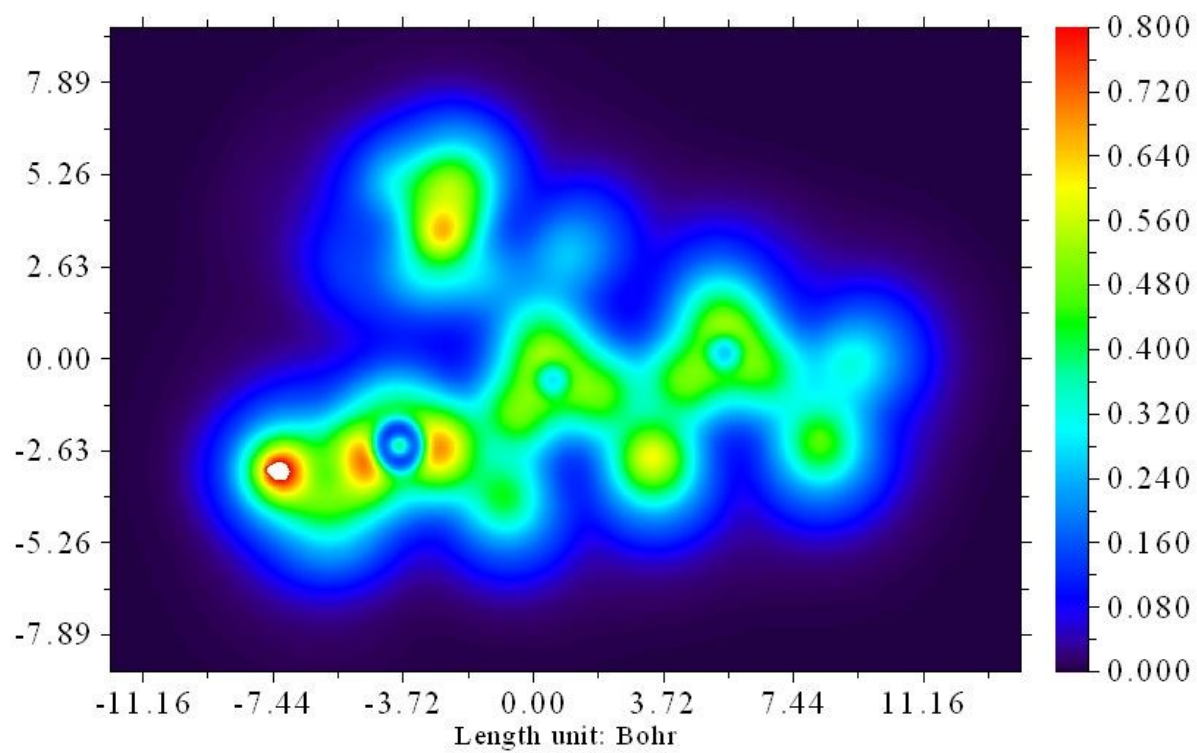

**Fig. S12** Two dimensional graphical embodiments of Localized Orbital Locator (LOL) of AOEMHA.

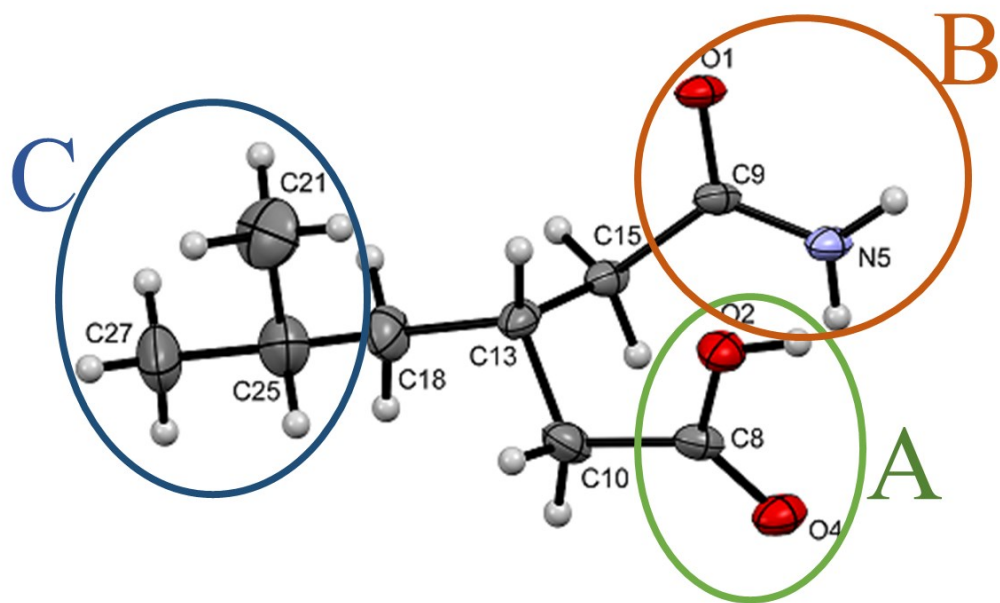

**Fig. S13** Groups acid (A), amide(B)and isopropyl (C) of AOEMHA compound.



**Table S1**

Topological analysis performed via QTAIM for the crystal structures of 3-(2-amino-2-oxoethyl)-5-methylhexanoic acid, all data are in a.u..

| BCP | $\rho(r_{bcp})$ | $\nabla^2\rho(r_{bcp})$ | $V(r_{bcp})$ | $G(r_{bcp})$ | $H(r_{bcp})$ | Interactions |
|-----|-----------------|-------------------------|--------------|--------------|--------------|--------------|
| 1   | 0.0251          | 0.0929                  | -0.0187      | 0.0209       | 0.0023       | N5-H6···O4   |
| 2   | 0.0211          | 0.0779                  | -0.0146      | 0.0170       | 0.0024       | N5-H7···O1   |
| 3   | 0.0505          | 0.1411                  | -0.0487      | 0.0420       | -0.0067      | O2-H3···O1   |

**Table S2**

Geometrical parameters of the 3-(2-amino-2-oxoethyl)-5-methylhexanoic acid.

| Bond lengths (Å) DFT /XRD   |                 |                 |                  |
|-----------------------------|-----------------|-----------------|------------------|
| O1-C9                       | 1.259/1.219 (6) | C18-C25         | 1.541/1.463(13)  |
| C8-O2                       | 1.351/1.313(7)  | C21-C25         | 1.535/1.508(14)  |
| C8-O4                       | 1.209 /1.204(8) | C8-C10          | 1.508/1.494(10)  |
| N5-C9                       | 1.368/1.303(9)  | C9-C15          | 1.528/1.502(8)   |
| C13-C18                     | 1.543/1.514(10) | C10-C13         | 1.551/1.539(10)  |
| C13-C15                     | 1.540/1.539(11) |                 |                  |
| Bond angles (°) DFT /XRD    |                 |                 |                  |
| O4-C8-O2                    | 122.4/122.6(7)  | C25-C18-C13     | 117.4/118.4(8)   |
| O4-C8-C10                   | 125.3/123.9(6)  | C18-C25-C21     | 112.3/114.7(8)   |
| O2-C8-C10                   | 112.2/113.5(6)  | C18-C25-C27     | 109.8/107.5(11)  |
| O1-C9-N5                    | 122.2/122.3(5)  | C9-C15-C13      | 114.1/114.9(5)   |
| O1-C9-C15                   | 122.2/120.2(6)  | C21-C25-C27     | 110.6/107.2(10)  |
| N5-C9-C15                   | 115.3/117.5(5)  | C18-C13-C15     | 109.8/108.8(6)   |
| C8-C10-C13                  | 113.5/116.7(5)  | C10-C13-C15     | 112.0/111.3(5)   |
| C18-C13-C10                 | 110.4/112.4(6)  |                 |                  |
| Dihedral angle (°) DFT /XRD |                 |                 |                  |
| O4-C8-C10-C13               | -88.9/-119.1(7) | C18-C13-C15-C9  | 154.0/150.2(5)   |
| O2-C8-C10-C13               | 90.5/58.9(8)    | C10-C13-C15-C9  | -82.7/-85.4(6)   |
| C8-C10-C13-C18              | -179.0/176.3(6) | C10-C13-C18-C25 | 60.5/68.4(10)    |
| C8-C10-C13-C15              | 58.0/53.9(8)    | C15-C13-C18-C25 | -175.3/-167.9(7) |
| O1-C9-C15-C13               | -31.7/-60.4(7)  | C13-C18-C25-C21 | 58.7/60.8(13)    |
| N5-C9-C15-C13               | 153.0/119.6(6)  | C13-C18-C25-C27 | -177.6/179.9(8)  |

**Table S3**

Calculated scaled wave numbers, observed IR and Raman bands and assignment of 3-(2-amino-2-oxoethyl)-5-methylhexanoic acid.

| $\nu$ (cm <sup>-1</sup> ) | B3LYP/6-311G++(d,p) |                | $\nu$ (IR)          | $\nu$ (Raman)       | Assignments <sup>a</sup>                                                                                 |
|---------------------------|---------------------|----------------|---------------------|---------------------|----------------------------------------------------------------------------------------------------------|
|                           | IR intensity        | Raman activity | (cm <sup>-1</sup> ) | (cm <sup>-1</sup> ) |                                                                                                          |
| 3612                      | 70.901              | 116.0642       | 3440                | -                   | $\nu$ O(2)-H(3) (100)                                                                                    |
| 3554                      | 31.8096             | 52.1058        | 3366                | 3366                | $\nu$ N(5)-H2(6,7) (100)                                                                                 |
| 3437                      | 33.8974             | 158.4244       | 3219                | 3215                | $\nu$ N(5)-H2(6,7) (100)                                                                                 |
| 2995                      | 12.4581             | 53.9274        | -                   | -                   | $\nu$ C(10)-H2(11,12) (97)                                                                               |
| 2972                      | 33.12               | 54.4869        | -                   | -                   | $\nu$ C(21)-H3(22,23,24) (91)                                                                            |
| 2964                      | 53.6399             | 123.5973       | 2960                | 2961                | $\nu$ C(27)-H3(28,29,30) (83)                                                                            |
| 2959                      | 60.0862             | 73.8392        | -                   | 2959                | $\nu$ C(21)-H3(22,23,24) (48)<br>$\nu$ C(27)-H3(28,29,30) (40)<br>$\nu$ C(21)-H3(22,23,24) (10)          |
| 2956                      | 19.9134             | 4.7642         | 2955                | 2955                | $\nu$ C(15)-H2(16,17) (11)<br>$\nu$ C(13)-H(14) (58)                                                     |
| 2953                      | 5.7175              | 20.5157        | -                   | 2949                | $\nu$ C(21)-H3(22,23,24) (24)<br>$\nu$ C(27)-H3(28,29,30) (64)                                           |
| 2940                      | 4.2926              | 33.837         | -                   | 2938                | $\nu$ C(15)-H2(16,17) (80)<br>$\nu$ C(13)-H(14) (11)                                                     |
| 2933                      | 9.3423              | 116.375        | 2930                | -                   | $\nu$ C(10)-H2(12,11) (81)<br>$\nu$ C(13)-H(14) (13)                                                     |
| 2910                      | 38.3656             | 58.1247        | 2916                | -                   | $\nu$ C(18)-H2(19,20) (71)                                                                               |
| 2902                      | 17.817              | 274.6999       | 2901                | -                   | $\nu$ C(21)-H3(22,23,24) (75)                                                                            |
| 2896                      | 34.1761             | 40.1875        | -                   | -                   | $\nu$ C(21)-H3(22,23,24) (11)<br>$\nu$ C(27)-H3(28,29,30) (78)                                           |
| 2881                      | 8.4607              | 123.5375       | 2879                | -                   | $\nu$ C(25)-H(26) (84)                                                                                   |
| 2873                      | 24.3515             | 67.7387        | 2874                | 2875                | $\nu$ C(18)-H2(19,20) (97)                                                                               |
| 1725                      | 390.0101            | 9.646          | 1702                | 1701                | $\nu$ C(8)=O(4) (82)                                                                                     |
| 1688                      | 226.8163            | 9.1042         | 1667                | 1668                | $\nu$ C(9)=O(1) (79)                                                                                     |
| 1564                      | 89.1245             | 2.7225         | -                   | 1551                | $\delta$ N(5)-H2(6,7) (83)                                                                               |
| 1454                      | 15.181              | 0.3587         | 1460                | -                   | $\delta$ C(21)-H3(22,23,24) (49)<br>$\delta$ C(27)-H3(28,29,30) (26)                                     |
| 1447                      | 5.5011              | 11.444         | -                   | 1449                | $\delta$ C(21)-H3(22,23,24) (19)<br>$\delta$ C(27)-H3(28,29,30) (38)<br>$\delta$ C(27)-H3(28,29,30) (29) |
| 1437                      | 3.5032              | 0.3825         | -                   | 1435                | $\delta$ C(21)-H3(22,23,24) (21)<br>$\delta$ C(18)-H2(19,20) (15)                                        |
| 1434                      | 1.8608              | 14.832         | 1431                | 1432                | $\delta$ C(27)-H3(28,29,30) (46)<br>$\delta$ C(21)-H3(22,23,24) (27)                                     |
| 1428                      | 11.2586             | 2.2754         | 1426                | 1427                | $\delta$ C(10)-H2(11,12) (64)<br>$\delta$ C(18)-H2(19,20) (10)                                           |
| 1424                      | 0.4432              | 3.2615         | -                   | -                   | $\delta$ C(18)-H2(19,20) (44)                                                                            |
| 1403                      | 5.7633              | 3.666          | -                   | 1405                | $\delta$ C(15)-H2(16,17) (82)                                                                            |
| 1369                      | 10.7188             | 0.1412         | 1368                | 1367                | $\delta$ C(21)-H3(22,23,24) (46)<br>$\delta$ C(27)-H3(28,29,30) (37)                                     |
| 1340                      | 13.73               | 0.36103        | 1341                | 1339                | $\delta$ C(21)-H3(22,23,24) (37)                                                                         |

|      |          |        |      |      |                                                     |
|------|----------|--------|------|------|-----------------------------------------------------|
|      |          |        |      |      | $\delta\text{C}(27)\text{-H3}(28,29,30)$ (47)       |
|      |          |        |      |      | $\delta\text{C}(25)\text{-H}(26)$ (22)              |
| 1315 | 48.5725  | 2.8269 | 1312 | 1311 | $\delta\text{C}(10)\text{-H2}(11,12)$ (10)          |
|      |          |        |      |      | $\delta\text{O}(2)\text{-H}(3)$ (14)                |
|      |          |        |      |      | $\nu\text{C}(8)\text{-O}(2)$ (11)                   |
| 1272 | 46.0338  | 4.5367 | 1243 | 1245 | $\delta\text{C}(9)\text{-N}(5)$ (12)                |
| 1174 | 103.2899 | 1.3971 | 1169 | 1170 | $\delta\text{O}(2)\text{-H}(3)$ (18)                |
|      |          |        |      |      | $\delta\text{C}(15)\text{-H2}(16,17)$ (21)          |
|      |          |        |      |      | $\delta\text{C}(21)\text{-H3}(22,23,24)$ (15)       |
| 1144 | 10.0084  | 2.7744 | 1136 | 1137 | $\delta\text{C}(27)\text{-H3}(28,29,30)$ (12)       |
|      |          |        |      |      | $\nu\text{C}(25)\text{-C}(18)$ (11)                 |
|      |          |        |      |      | $\nu\text{C}(8)\text{-O}(2)$ (11)                   |
| 1122 | 39.8068  | 3.6323 | -    | -    | $\delta\text{C}(15)\text{-H2}(16,17)$ (14)          |
| 1112 | 13.9083  | 3.9656 | 1112 | 1112 | $\delta\text{C}(27)\text{-H3}(28,29,30)$ (12)       |
| 1056 | 17.6148  | 6.2216 | 1054 | 1053 | $\delta\text{N}(5)\text{-H2}(6,7)$ (33)             |
|      |          |        |      |      | $\nu\text{C}(9)\text{-N}(5)$ (21)                   |
| 973  | 16.929   | 1.6342 | 974  | 977  | $\nu\text{C}(18)\text{-C}(13)$ (13)                 |
|      |          |        |      |      | $\delta\text{C}(21)\text{-H3}(22,23,24)$ (11)       |
| 929  | 1.3727   | 3.6284 | 927  | 931  | $\delta\text{C}(27)\text{-H3}(28,29,30)$ (29)       |
|      |          |        |      |      | $\nu\text{C}(21)\text{-C}(25)$ (15)                 |
|      |          |        |      |      | $\nu\text{C}(27)\text{-C}(25)$ (24)                 |
| 926  | 1.9159   | 4.1986 | 921  | -    | $\nu\text{C}(25)\text{-C}(28)$ (29)                 |
|      |          |        |      |      | $\delta\text{C}(21)\text{-H3}(22,23,24)$ (24)       |
| 896  | 1.3223   | 0.5884 | 895  | 896  | $\delta\text{C}(27)\text{-H3}(28,29,30)$ (17)       |
|      |          |        |      |      | $\nu\text{C}(8)\text{-C}(10)$ (15)                  |
| 886  | 1.6389   | 2.0727 | 883  | -    | $\nu\text{C}(15)\text{-C}(13)$ (13)                 |
|      |          |        |      |      | $\nu\text{C}(8)\text{-O}(2)$ (10)                   |
|      |          |        |      |      | $\nu\text{C}(8)\text{-C}(10)$ (17)                  |
| 865  | 2.0423   | 3.1983 | -    | -    | $\nu\text{C}(10)\text{-C}(13)$ (20)                 |
|      |          |        |      |      | $\delta\text{C}(15)\text{-H2}(16,17)$ (16)          |
| 851  | 1.3855   | 6.0553 | 848  | -    | $\nu\text{C}(8)\text{-O}(2)$ (13)                   |
| 816  | 3.2241   | 0.4641 | 812  | 810  | $\delta\text{C}(18)\text{-H2}(19,20)$ (12)          |
|      |          |        |      |      | $\nu\text{C}(9)\text{-C}(15)$ (11)                  |
|      |          |        |      |      | $\nu\text{C}(21)\text{-C}(25)$ (27)                 |
| 771  | 3.5548   | 1.9663 | -    | 770  | $\nu\text{C}(25)\text{-C}(27)$ (10)                 |
|      |          |        |      |      | $\nu\text{C}(25)\text{-C}(18)$ (15)                 |
|      |          |        |      |      | $\delta\text{C}(18)\text{-H2}$ (19,20) (10)         |
| 713  | 48.7772  | 4.6316 | 718  | 717  | $\delta\text{C}(8)\text{-O}(2)$ (38)                |
|      |          |        |      |      | $\nu\text{C}(10)\text{-C}(13)$ (15)                 |
| 651  | 14.4062  | 2.784  | 653  | 650  | $\delta\text{C}(5)\text{-N}(9)$ (17)                |
|      |          |        |      |      | $\delta\text{C}(9)=\text{O}(1)$ (17)                |
| 598  | 34.5304  | 1.2808 | 595  | 597  | $\delta\text{C}(8)=\text{O}(4)$ (26)                |
|      |          |        |      |      | $\tau\text{O}(2)\text{-H}(3)$ (32)                  |
| 568  | 24.294   | 1.2541 | -    | 565  | $\delta\text{C}(8)=\text{O}(4)$ (10)                |
|      |          |        |      |      | $\tau\text{H}(6)\text{-N}(5)\text{-H}(7)$ (17)      |
| 555  | 93.4842  | 1.1898 | -    | 553  | $\delta\text{C}(8)=\text{O}(4)$ (21)                |
|      |          |        |      |      | $\tau\text{O}(2)\text{-H}(3)$ (46)                  |
| 513  | 27.1171  | 0.8682 | 512  | 512  | $\delta\text{C}(9)=\text{O}(1)$ (18)                |
|      |          |        |      |      | $\delta\text{C}(25)\text{-C}(18)\text{-C}(13)$ (13) |
| 385  | 27.4428  | 1.403  | -    | 382  | $\delta\text{C}(9)\text{-N}(5)$ (10)                |

|     |        |        |   |     |                                                                                                                                                                   |
|-----|--------|--------|---|-----|-------------------------------------------------------------------------------------------------------------------------------------------------------------------|
| 345 | 0.3553 | 1.4913 | - | 344 | $\delta$ C(18)-C(25)-C(21) (12)<br>$\delta$ C(27)-C(25)-C(21) (29)<br>$\delta$ C(9)-N(5) (14)<br>$\delta$ C(8)-O(2) (10)<br>$\delta$ C(10)-C(15)-C(18)-C(13) (32) |
| 254 | 0.1882 | 1.7422 | - | 252 | $\delta$ C(21)-H3(22,23,24) (10)<br>$\delta$ C(15)-C(13)-C(18) (16)                                                                                               |
| 236 | 0.7314 | 1.3663 | - | -   | $\delta$ C(21)-H3(22,23,24) (14)<br>$\delta$ C(27)-H3 (28,29,30) (64)<br>$\delta$ C(21)-C(25)-C(27) (21)                                                          |
| 218 | 0.1036 | 0.0129 | - | 216 | $\delta$ C(21)-H3(22,23,24) (14)<br>$\delta$ C(27)-H3(28,29,30) (64)                                                                                              |
| 42  | 7.6319 | 0.9935 | - | -   | $\tau$ N(5)-C(9) (60)                                                                                                                                             |

<sup>a</sup>v-stretching;  $\delta$ -in-plane deformation and out-of-plane deformation;  $\tau$ -torsion; potential energy distribution is given in brackets (%) in the assignment column.

**Table S4**

Second-order perturbation theory analysis of Fock matrix in NBO basis corresponding to the intramolecular bonds of the title compound.

| Donor(i) | Type     | ED/e    | Acceptor(j) | Type       | ED/e    | E(2) <sup>a</sup> | E(j)-E(i) <sup>b</sup> | F(i,j) <sup>c</sup> |
|----------|----------|---------|-------------|------------|---------|-------------------|------------------------|---------------------|
| O1-C9    | $\sigma$ | 1.99423 | N5-C9       | $\sigma^*$ | 0.06693 | 0.80              | 1.45                   | 0.031               |
|          |          |         | C9-C15      | $\sigma^*$ | 0.06616 | 1.03              | 1.37                   | 0.034               |
| O1-C9    | $\pi$    | 1.98752 | O1-C9       | $\pi^*$    | 0.23724 | 1.03              | 0.51                   | 0.022               |
| O4-C8    | $\sigma$ | 1.99619 | C8-C10      | $\sigma^*$ | 0.05680 | 1.50              | 1.48                   | 0.043               |
| O4-C8    | $\pi$    | 1.99013 | O1-C9       | $\pi^*$    | 0.23724 | 0.51              | 0.47                   | 0.051               |
| -        | -        | -       | O4-C8       | $\pi^*$    | 0.21238 | 0.77              | 0.40                   | 0.016               |
| N5-C9    | $\sigma$ | 1.99480 | O1-C9       | $\sigma^*$ | 0.04383 | 0.71              | 1.39                   | 0.028               |
| -        | -        | -       | C13-C15     | $\sigma^*$ | 0.01739 | 0.77              | 1.21                   | 0.027               |
| C8-C10   | $\sigma$ | 1.97926 | O4-C8       | $\sigma^*$ | 0.02304 | 1.14              | 1.26                   | 0.034               |
| -        | -        | -       | C10-C13     | $\sigma^*$ | 0.02160 | 0.74              | 1.02                   | 0.025               |
| -        | -        | -       | C13-C18     | $\sigma^*$ | 0.01806 | 1.78              | 1.04                   | 0.039               |
| C9-C15   | $\sigma$ | 1.97941 | O1-C9       | $\sigma^*$ | 0.04383 | 0.74              | 1.18                   | 0.027               |
|          |          |         | C13-C15     | $\sigma^*$ | 0.01739 | 0.68              | 1.01                   | 0.023               |
| LPO1     | $\sigma$ | 1.97714 | N5-C9       | $\sigma^*$ | 0.06693 | 1.57              | 1.13                   | 0.038               |
| -        | -        | -       | C9-C15      | $\sigma^*$ | 0.06616 | 2.34              | 1.05                   | 0.045               |
| LPO1     | $\pi$    | 1.86742 | N5-C9       | $\sigma^*$ | 0.06693 | 24.75             | 0.70                   | 0.120               |
|          |          |         | C9-C15      | $\sigma^*$ | 0.06616 | 19.40             | 0.62                   | 0.100               |
| LPO2     | $\sigma$ | 1.97696 | O4-C8       | $\sigma^*$ | 0.02304 | 7.04              | 1.24                   | 0.083               |
| LPO2     | $\pi$    | 1.81759 | O4-C8       | $\pi^*$    | 0.21238 | 45.37             | 0.34                   | 0.112               |
| LPO4     | $\sigma$ | 1.97713 | O2-C8       | $\sigma^*$ | 0.09936 | 1.38              | 1.05                   | 0.035               |
| -        | -        | -       | C8-C10      | $\sigma^*$ | 0.05680 | 2.69              | 1.69                   | 0.049               |
| LPO4     | $\pi$    | 1.85504 | O2-C8       | $\sigma^*$ | 0.09936 | 32.95             | 0.62                   | 0.129               |
| -        | -        | -       | C8-C10      | $\sigma^*$ | 0.05680 | 16.77             | 0.66                   | 0.096               |
| LPN5     | $\sigma$ | 1.76508 | O1-C9       | $\sigma^*$ | 0.23724 | 3.43              | 0.84                   | 0.050               |
| -        | -        | -       | O1-C9       | $\pi^*$    | 0.01084 | 35.29             | 0.37                   | 0.101               |

**Table S5**

NBO results showing the formation of Lewis and non-Lewis orbitals.

| Bond(A-B)       | ED/e <sup>a</sup> | EDA%  | EDB%  | NBO               | s%    | p%    |
|-----------------|-------------------|-------|-------|-------------------|-------|-------|
| $\sigma$ O1-C9  | 1.99423           | 65.32 | 34.68 | 0.8082(sp1.70)O+  | 37.04 | 62.84 |
| -               | -0.99528          | -     | -     | 0.5889(sp2.36)C   | 29.71 | 70.11 |
| $\pi$ O1-C9     | 1.98752           | 70.17 | 29.83 | 0.8377(sp23.39)O+ | 4.09  | 95.79 |
| -               | -0.43597          | -     | -     | 0.5461(sp33.92)C  | 2.85  | 96.70 |
| $\sigma$ O4-C8  | 1.99619           | 65.21 | 34.79 | 0.8076(sp1.43)O+  | 41.05 | 58.82 |
| -               | -1.09905          | -     | -     | 0.5898(sp1.95)C   | 33.86 | 65.98 |
| $\pi$ O4-C8     | 1.99013           | 70.56 | 29.44 | 0.8400(sp1.00)O+  | 0.01  | 99.87 |
| -               | -0.39615          | -     | -     | 0.5426(sp99.99)C  | 0.01  | 99.47 |
| $\sigma$ N5-C9  | 1.99480           | 61.52 | 38.48 | 0.7844(sp1.60)N+  | 38.49 | 61.45 |
| -               | -0.84039          | -     | -     | 0.6203(sp2.18)C   | 31.44 | 68.46 |
| $\sigma$ C8-C10 | 1.97926           | 49.01 | 50.99 | 0.7001(sp1.55)C+  | 39.15 | 60.82 |
| -               | -0.65949          | -     | -     | 0.7141(sp2.94)C   | 25.37 | 74.56 |
| $\sigma$ C9-C15 | 1.97941           | 48.51 | 51.49 | 0.6965(sp1.78)C+  | 35.93 | 64.04 |
| -               | -0.63444          | -     | -     | 0.7176(sp2.85)C   | 25.94 | 74.00 |
| n1O1            | 1.97714           | -     | -     | sp0.70            | 58.88 | 41.11 |
| -               | -0.68206          | -     | -     | -                 | -     | -     |
| n2O1            | 1.86742           | -     | -     | sp99.99           | 0.03  | 99.90 |
| -               | -0.25214          | -     | -     | -                 | -     | -     |
| n1O2            | 1.97696           | -     | -     | sp1.22            | 45.05 | 54.91 |
| -               | -0.63366          | -     | -     | -                 | -     | -     |
| n2O2            | 1.81759           | -     | -     | sp99.99           | 0.04  | 99.90 |
| -               | -0.34337          | -     | -     | -                 | -     | -     |
| n1O4            | 1.97713           | -     | -     | sp0.70            | 58.97 | 41.01 |
| -               | -0.71064          | -     | -     | -                 | -     | -     |
| n2O4            | 1.85504           | -     | -     | sp99.99           | 0.02  | 99.90 |
| -               | -0.27818          | -     | -     | -                 | -     | -     |
| n1N5            | 1.76508           | -     | -     | sp17.93           | 5.28  | 94.70 |
| -               | -0.28851          | -     | -     | -                 | -     | -     |

<sup>a</sup> ED/e is expressed in a.u.

**Table S6**  
Partial Charges in isolated and embedded molecule

|    |         | Isolated | Embedded | $\Delta\%$ |
|----|---------|----------|----------|------------|
| 1  | O1      | -0.64216 | -0.86436 | 34.60239   |
| 2  | O2      | -0.65783 | -0.70026 | 6.45125    |
| 3  | H2      | 0.453281 | 0.533309 | 17.65527   |
| 4  | O4      | -0.60573 | -0.68518 | 13.11649   |
| 5  | N5      | -1.00406 | -0.91446 | 8.923734   |
| 6  | H1A     | 0.438875 | 0.44947  | 2.414127   |
| 7  | H1B     | 0.43395  | 0.453312 | 4.461804   |
| 8  | C8      | 0.797366 | 0.882077 | 10.62385   |
| 9  | C9      | 0.855179 | 0.982773 | 14.92015   |
| 10 | C10     | -0.18827 | -0.32223 | 71.15101   |
| 11 | H8A     | 0.046685 | 0.075207 | 61.09457   |
| 12 | H8B     | 0.01742  | 0.044151 | 153.4501   |
| 13 | C13     | 0.448429 | 0.480093 | 7.061096   |
| 14 | H1      | -0.08142 | -0.07813 | 4.047947   |
| 15 | C15     | -0.43193 | -0.61299 | 41.91899   |
| 16 | H6A     | 0.074392 | 0.157918 | 112.2782   |
| 17 | H6B     | 0.098332 | 0.152924 | 55.51804   |
| 18 | C18     | -0.23558 | -0.21247 | 9.810131   |
| 19 | H2A     | 0.044388 | 0.055196 | 24.34892   |
| 20 | H2B     | 0.036963 | 0.0518   | 40.14014   |
| 21 | C21     | -0.22882 | -0.22898 | 0.070361   |
| 22 | H5A     | 0.035764 | 0.029397 | 17.80282   |
| 23 | H5B     | 0.047476 | 0.04427  | 6.752886   |
| 24 | H5C     | 0.047986 | 0.043446 | 9.461093   |
| 25 | C25     | 0.389423 | 0.378975 | 2.682944   |
| 26 | H3      | -0.08958 | -0.08463 | 5.529198   |
| 27 | C27     | -0.25239 | -0.24936 | 1.202098   |
| 28 | H4A     | 0.06072  | 0.065769 | 8.315217   |
| 29 | H4B     | 0.053721 | 0.04795  | 10.74254   |
| 30 | H4C     | 0.037416 | 0.025002 | 33.17832   |
|    | Group A | -0.0129  | 0.029946 | 332.0496   |
|    | Group B | 0.081785 | 0.106735 | 30.50682   |
|    | Group C | 0.101715 | 0.071844 | 29.36735   |



**Table S7**

Comparison of linear refractive index for 3-(2-amino-2-oxoethyl)-5-methylhexanoic acid crystal with experimental results for others organic crystals.

|                                                                                                                     | <i>n</i> |
|---------------------------------------------------------------------------------------------------------------------|----------|
| 3-(2-amino-2-oxoethyl)-5-methylhexanoic acid (Present work)                                                         | 1.455    |
| 1-(5-chlorothiophen-2-yl)-3-(2,3-dimethoxyphenyl)prop-2-en-1-one(CTDMP) <sup>84,85</sup>                            | 1.594    |
| (2E)-3[4(methylsulfanyl)phenyl]-1-(4-nitrophenyl)prop-2-en-1-one(4N4MSP) <sup>9,85</sup>                            | 1.360    |
| (2E)-1-(4-bromophenyl)-3-[4(methylsulfanyl)phenyl]prop-2-en-1-one(4Br4MSP) <sup>9,85</sup>                          | 1.363    |
| (2E)-1-[3-bromophenyl]-3(2E)-1-(3-bromophenyl)-3-[(4methylsulfanyl)phenyl]-prop-2-en-1-one(3Br4MSP) <sup>9,85</sup> | 1.365    |

**Table S8**

Molecular docking values of AOEMHA with target proteins (a) 4BDU, (b) 4DBS, (c) 4DBW, (d) 4FAL and (e) 4FAM.

| Protein (PDB ID) | Bond distance (Å) | Bonded residues | Estimated inhibition constant (μm) | Binding energy (kcal/mol) | Intermolecular energy (kcal/mol) | Reference RMSD (Å) |
|------------------|-------------------|-----------------|------------------------------------|---------------------------|----------------------------------|--------------------|
| 4BDU             | 2.5               | SER 271         | 236.05                             | -4.95                     | -7.04                            | 47.401             |
|                  | 2.1               | ARG 276         |                                    |                           |                                  |                    |
|                  | 2.0               | LYS270          |                                    |                           |                                  |                    |
|                  | 1.8               | TYR272          |                                    |                           |                                  |                    |
| 4DBS             | 1.7               | LYS270          | 927.65                             | -4.14                     | -6.23                            | 30.006             |
|                  | 2.3               | ARG276          |                                    |                           |                                  |                    |
|                  | 2.1               | ARG276          |                                    |                           |                                  |                    |
| 4DBW             | 2.4               | LYS270          | 339.39                             | -4.73                     | -6.82                            | 30.052             |
|                  | 1.8               | LYS270          |                                    |                           |                                  |                    |
|                  | 2.4               | ARG276          |                                    |                           |                                  |                    |
|                  | 1.8               | ARG276          |                                    |                           |                                  |                    |
|                  | 2.2               | TYR272          |                                    |                           |                                  |                    |
| 4FAL             | 2.4               | LYS270          | 484.06                             | -4.52                     | -6.61                            | 3.191              |
|                  | 2.2               | SER271          |                                    |                           |                                  |                    |
|                  | 1.8               | LYS270          |                                    |                           |                                  |                    |
|                  | 2.0               | ARG276          |                                    |                           |                                  |                    |
|                  | 2.2               | ARG276          |                                    |                           |                                  |                    |
|                  | 2.4               | TYR272          |                                    |                           |                                  |                    |
| 4FAM             | 1.8               | ARG276          | 377.69                             | -4.67                     | -6.76                            | 15.296             |
|                  | 2.4               | TYR272          |                                    |                           |                                  |                    |
|                  | 2.0               | LYS270          |                                    |                           |                                  |                    |
|                  | 2.3               | LYS270          |                                    |                           |                                  |                    |
|                  | 2.3               | GLN222          |                                    |                           |                                  |                    |
